# Supplementary material for: Cage-rearranged and cage-intact syntheses of azido-functionalized larger T10 and T12 POSSs
Source: Royal Society of Chemistry journal article supplement (doi:10.1039/d4dt00440j), 2024-01-01
Supplement: d4dt00440j1.pdf [file d4dt00440j1.pdf]

Supporting Information

## Cage-Rearranged and Cage-Intact Syntheses of Azido-Functionalized Larger T<sub>10</sub> and T<sub>12</sub> POSS

Hui Wang,<sup>a</sup> Ming-Xi Nie,<sup>a</sup> Xiong Lin,<sup>a</sup> Xiangqian Li,<sup>b</sup> Hao Liu,<sup>b</sup> Qing-Yun Guo,<sup>\*,b</sup>

Di Han,<sup>\*,a</sup> and Qiang Fu<sup>a</sup>

<sup>a</sup> College of Polymer Science & Engineering, State Key Laboratory of Polymer Materials Engineering, Sichuan University, Chengdu 610065, P. R. China.

<sup>b</sup> Center for Advanced Low-Dimension Materials, State Key Laboratory for Modification of Chemical Fibers and Polymer Materials, College of Material Science and Engineering, Donghua University, Shanghai 201620, P. R. China.

\* Corresponding authors. E-mail: handi@scu.edu.cn (D. H.); qg6@uakron.edu (Q.-Y. G.)

### Experimental Section

**Scheme S1.** Synthetic route of T<sub>8</sub>Cl<sub>8</sub>.<sup>a</sup>

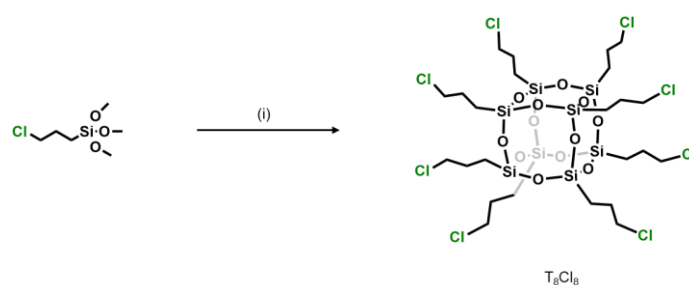

<sup>a</sup> Reagent and conditions: (i) HCl/Methanol, 60 °C, 72 h, yield: ~32%.

**Synthesis of octa (3-chloropropyl) POSS (T<sub>8</sub>Cl<sub>8</sub>).** The title compound was synthesized via the hydrolytic condensation of 3-chloropropyltrimethoxysilane as reported by Dittmar et al.<sup>1</sup> To a round-bottomed flask equipped with a magnetic stirrer, a condenser, and an addition funnel, methanol

(400 mL) and concentrated hydrochloric acid (22.5 mL) were mixed. Then, 19.87 g of 3-chloropropyltrimethoxysilane was dropwise added. After that, the mixture was heated to 60 °C and the white crystalline precipitate began to form after 20 h. 72 h later, the reaction was finished and the precipitated products were collected, washed with methanol, and dried in a vacuum to give a white powder. Yield: 32%. <sup>1</sup>H NMR (400 MHz, CDCl<sub>3</sub>, δ, ppm): 3.54 (16 H, t, -CH<sub>2</sub>Cl), 1.88 (16 H, m, -CH<sub>2</sub>-), 0.80 (16 H, m, -SiCH<sub>2</sub>-). <sup>13</sup>C NMR (100 MHz, CDCl<sub>3</sub>, δ, ppm): 46.98, 26.21, 9.30. <sup>29</sup>Si NMR (79 MHz, CDCl<sub>3</sub>, δ, ppm): -67.08. MALDI TOF (MS): Calcd. For (C<sub>16</sub>H<sub>24</sub>O<sub>12</sub>Si<sub>8</sub>Cl<sub>8</sub>Na): 1058.87 Da, Found: 1059.03 Da.

**Scheme S2.** Synthetic route of T<sub>10</sub>Cl<sub>10</sub>, and T<sub>12</sub>Cl<sub>12</sub> from cage-rearranged T<sub>8</sub>Cl<sub>8</sub>.<sup>a</sup>

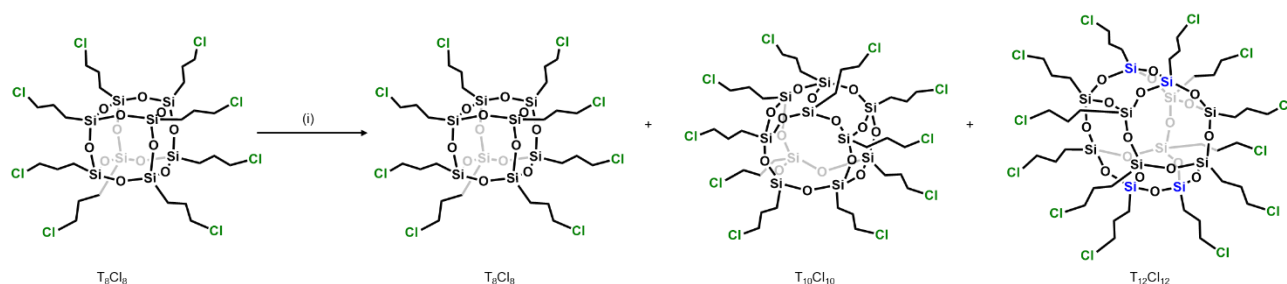

<sup>a</sup> Reagent and conditions: (i) K<sub>2</sub>CO<sub>3</sub>, DMF, 60 °C, 1 h, yield: ~56% for T<sub>8</sub>Cl<sub>8</sub>, ~24% for T<sub>10</sub>Cl<sub>10</sub>, and ~20% for T<sub>12</sub>Cl<sub>12</sub>.

**Syntheses of T<sub>10</sub>Cl<sub>10</sub> and T<sub>12</sub>Cl<sub>12</sub>.** The title compounds were synthesized following the literature procedure.<sup>2</sup> T<sub>8</sub>Cl<sub>8</sub> (2 g, 1.938 mmol), K<sub>2</sub>CO<sub>3</sub> (0.125 g, 0.904 mmol), and anhydrous DMF (20 mL) were mixed in a round bottom flask equipped with a magnetic stirring bar under nitrogen atmosphere. The mixture was then heated to 60 °C and reacted for 1 h. Afterward, the mixture was extracted using DCM (150 mL) and the organic phase was concentrated. The resulting viscous liquid was transferred onto a silica gel column using PE/DCM (v/v = 2/1) as eluent to obtain the desired products (*R<sub>f</sub>* = 0.5 for T<sub>8</sub>Cl<sub>8</sub>, *R<sub>f</sub>* = 0.35 for T<sub>10</sub>Cl<sub>10</sub>, and *R<sub>f</sub>* = 0.25 for T<sub>12</sub>Cl<sub>12</sub>).

T<sub>10</sub>Cl<sub>10</sub>. White powder, isolated yield: 24%. <sup>1</sup>H NMR (400 MHz, CDCl<sub>3</sub>, δ, ppm): 3.54 (20 H, t, -CH<sub>2</sub>Cl), 1.86 (20 H, m, -CH<sub>2</sub>-), 0.80 (20 H, m, -SiCH<sub>2</sub>-). <sup>13</sup>C NMR (100 MHz, CDCl<sub>3</sub>, δ, ppm): 47.25, 26.56, 10.05. <sup>29</sup>Si NMR (79 MHz, CDCl<sub>3</sub>, δ, ppm): -68.95. MALDI TOF (MS): Calcd. For

(C<sub>20</sub>H<sub>30</sub>O<sub>15</sub>Si<sub>10</sub>Cl<sub>10</sub>Na): 1316.84 Da, Found: 1317.05 Da.

T<sub>12</sub>Cl<sub>12</sub>. White powder, yield: 20%. <sup>1</sup>H NMR (400 MHz, CDCl<sub>3</sub>, δ, ppm): 3.54 (24 H, t, -CH<sub>2</sub>Cl), 1.85 (24 H, m, -CH<sub>2</sub>-), 0.79 (24 H, m, -SiCH<sub>2</sub>-). <sup>13</sup>C NMR (100 MHz, CDCl<sub>3</sub>, δ, ppm): 47.20, 26.56, 10.60. <sup>29</sup>Si NMR (79 MHz, CDCl<sub>3</sub>, δ, ppm): -68.71, -71.37. MALDI TOF (MS): Calcd. For (C<sub>24</sub>H<sub>36</sub>O<sub>18</sub>Si<sub>12</sub>Cl<sub>12</sub>Na): 1576.80 Da, Found: 1577.11 Da.

**Scheme S3.** Reaction route for rearrangement of T<sub>8</sub>Cl<sub>8</sub>, T<sub>10</sub>Cl<sub>10</sub>, and T<sub>12</sub>Cl<sub>12</sub> to T<sub>n</sub>(N<sub>3</sub>)<sub>n</sub> mixtures (n = 8, 10, 12).<sup>a</sup>

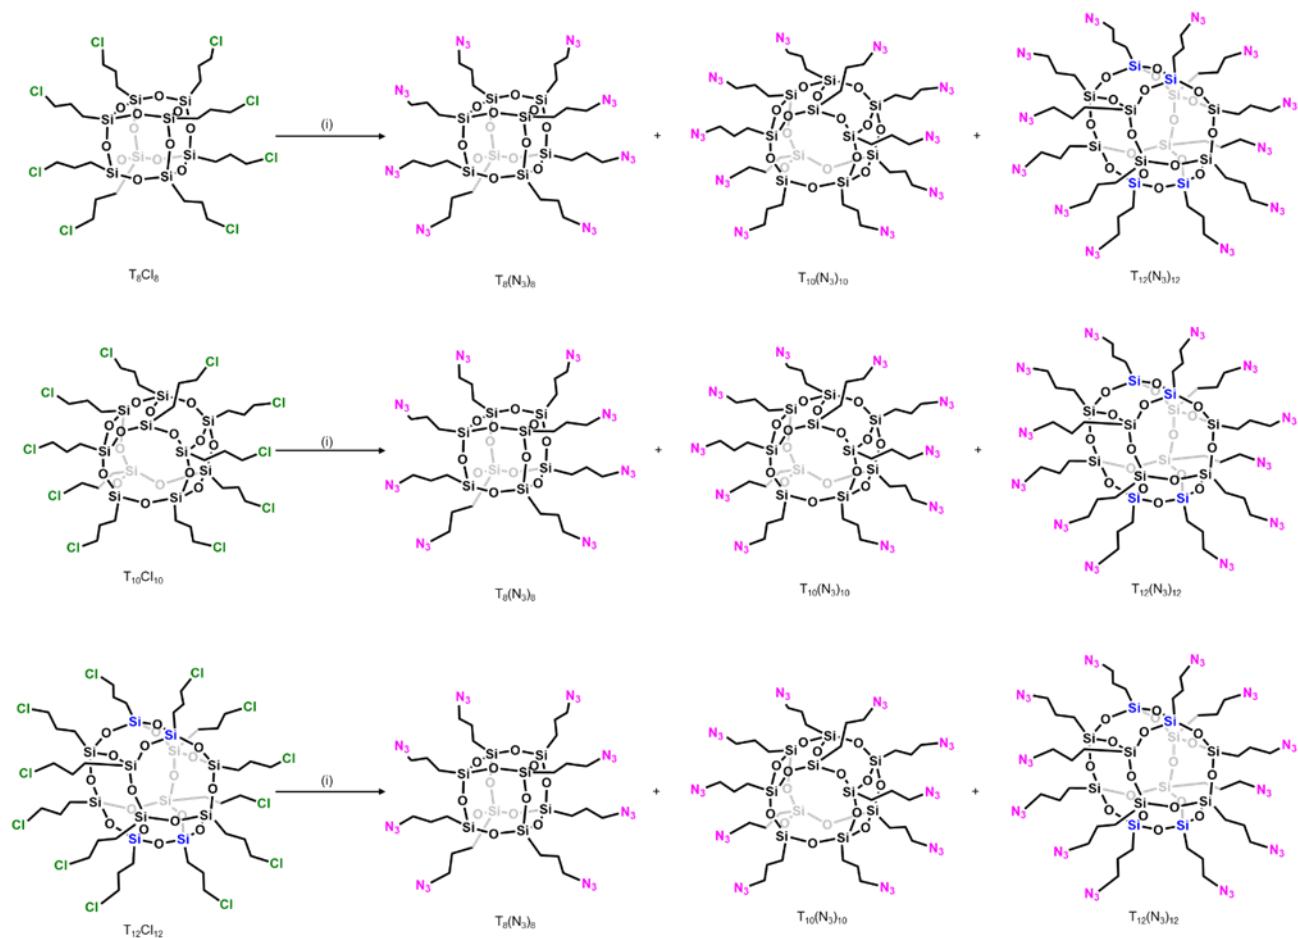

<sup>a</sup> Reagent and conditions: (i) NaN<sub>3</sub>, DMF, 60 °C, 16 h.

**Scheme S4.** Synthetic route of  $T_8(\text{SiN}_3)_8$ ,  $T_{10}(\text{SiN}_3)_{10}$ , and  $T_{12}(\text{SiN}_3)_{12}$ .<sup>a</sup>

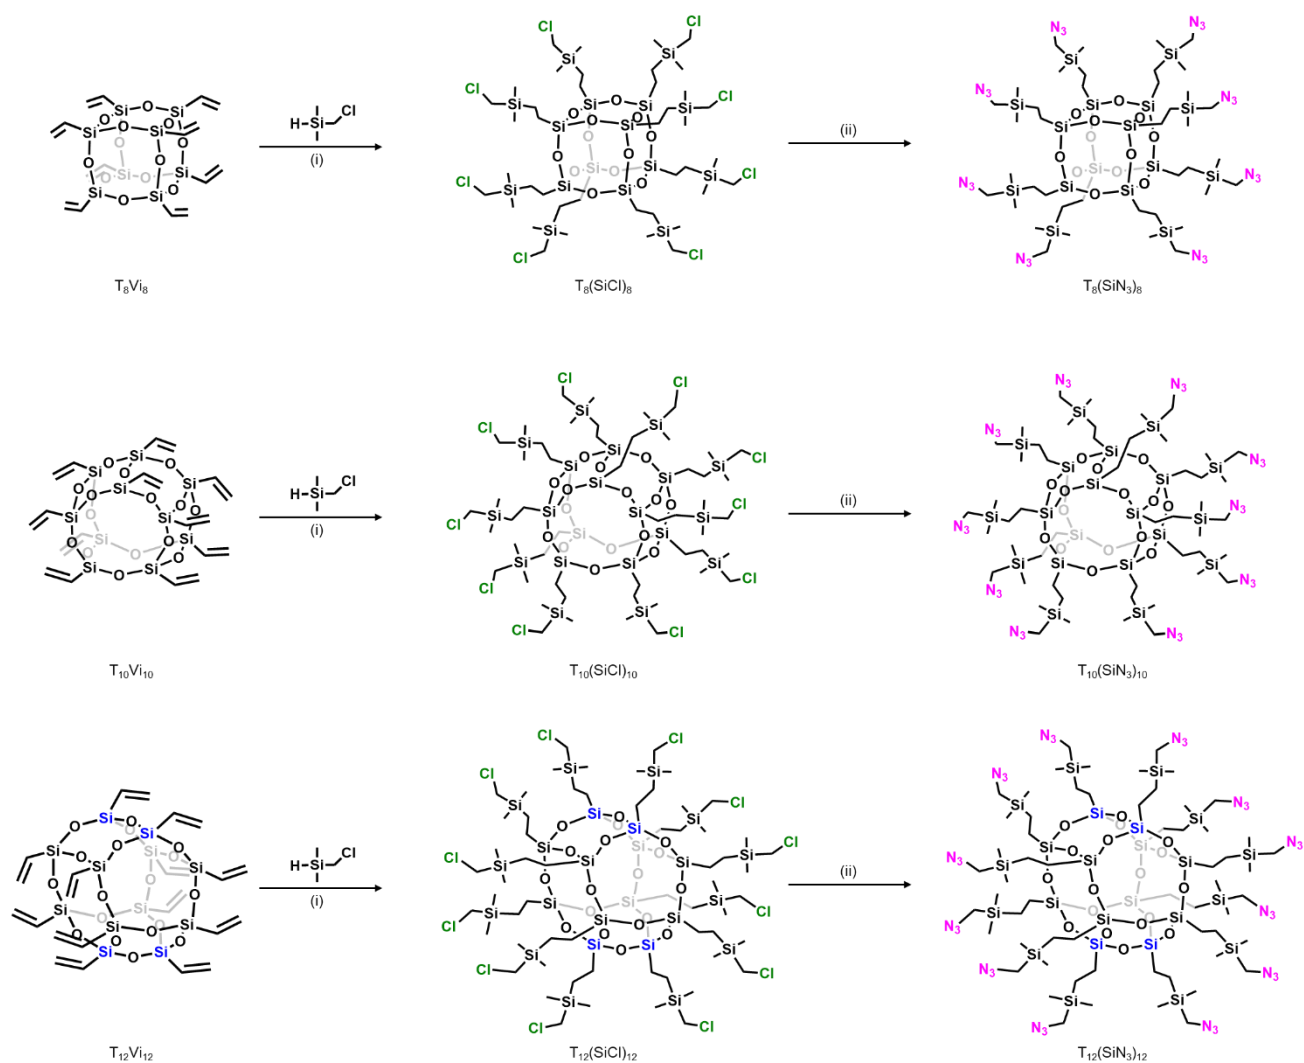

<sup>a</sup> Reagent and conditions: (i) Karstedt's, toluene, 70 °C, 72 h, yield: ~93% for  $T_8(\text{SiCl})_8$ , ~87% for  $T_{10}(\text{SiCl})_{10}$ , and ~85% for  $T_{12}(\text{SiCl})_{12}$ ; (ii)  $\text{NaN}_3$ , NaI, DMF, THF, 60 °C, 24 h, yield: ~90% for  $T_8(\text{SiN}_3)_8$ , ~87% for  $T_{10}(\text{SiN}_3)_{10}$ , and ~83% for  $T_{12}(\text{SiN}_3)_{12}$ .

**Instrumentation and Characterizations.** The  $^1\text{H}$ ,  $^{13}\text{C}$ , and  $^{29}\text{Si}$  NMR spectra were acquired in  $\text{CDCl}_3$  using a Bruker 400 MHz NMR spectrometer at ambient temperature. Matrix-assisted laser desorption ionization time of flight mass spectroscopy (MALDI-TOF MS) was performed on an ultraflextreme MALDI TOF/TOF Mass Spectrometer (Bruker Daltonics) in positive reflection mode. Size exclusion chromatography (SEC) results were obtained on an HLC-8320GPC instrument (Tosoh Corp., Japan) using THF as the eluent with a sample concentration of  $3 \text{ mg mL}^{-1}$  and a flow rate of  $0.6 \text{ mL min}^{-1}$ . Fourier transform infrared (FT-IR) spectra were recorded on a Nicolet 6700

spectrometer after mixing the samples with KBr and pressing them into pellets for further measurement. The energy dispersive X-ray spectroscopy (EDS) of C, N, O, and Si elements were captured using a Nova NanoSEM450 SEM (FEI, America) equipped with an X-MaxN EDS (Oxford Instruments, England) at a 20 kV accelerating voltage, and a thin layer of gold was sputtered onto the sample's surface prior to measurement. High performance liquid chromatography (HPLC) analyses were performed using a chromatographic system comprising an LC-100 pump (Wufeng Instrument, China) and an E800 evaporative light scattering detector (SANAER Instrument, China), with THF/H<sub>2</sub>O (3/1, v/v) employed as the mobile phase.

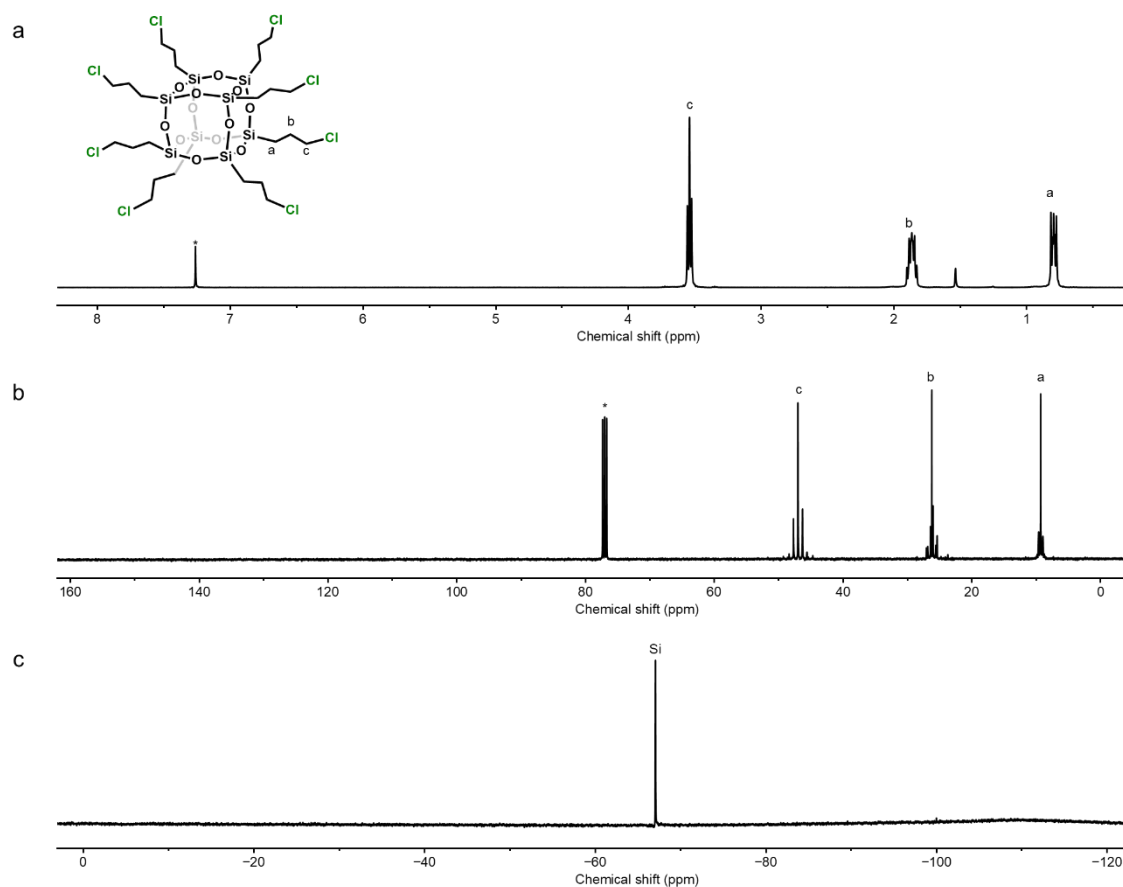

**Fig. S1.** (a) <sup>1</sup>H NMR, (b) <sup>13</sup>C NMR, and (c) <sup>29</sup>Si NMR of T<sub>8</sub>Cl<sub>8</sub>. Asterisk represents signal from CDCl<sub>3</sub>.

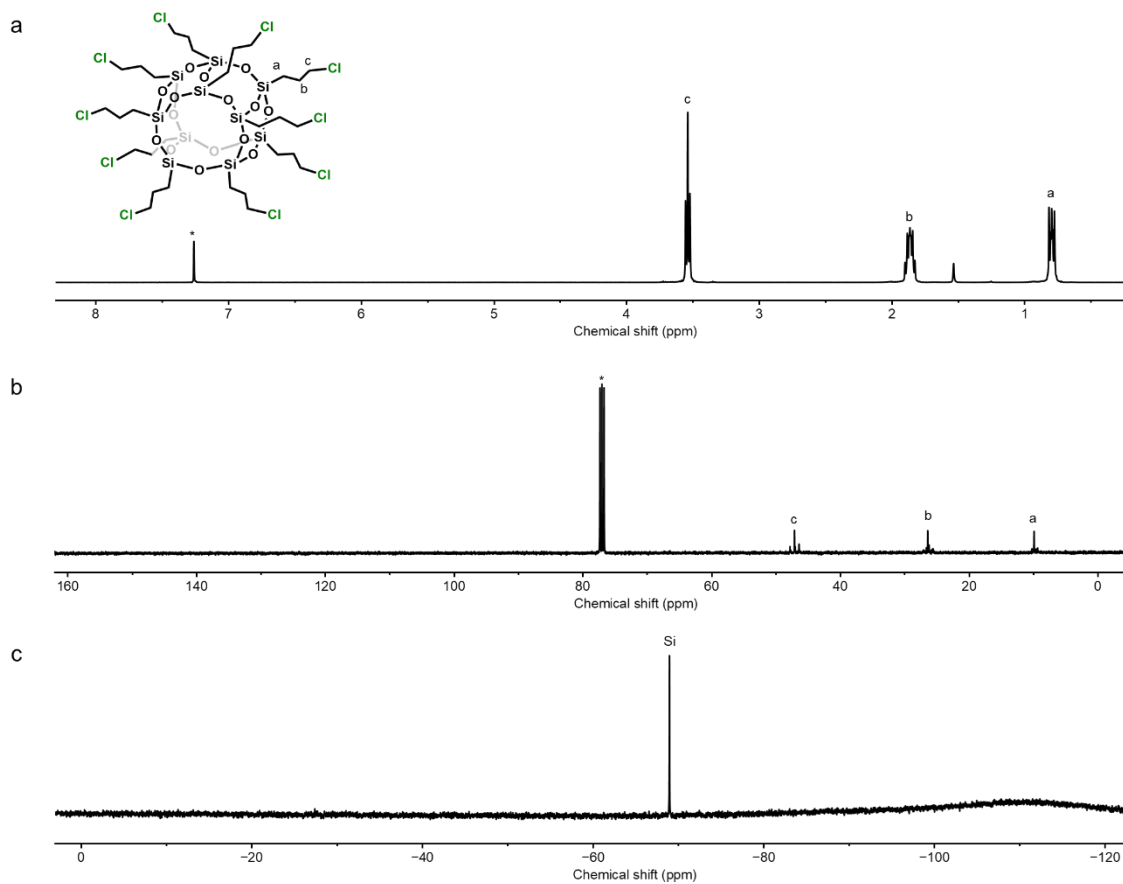

**Fig. S2.** (a)  $^1H$  NMR, (b)  $^{13}C$  NMR, and (c)  $^{29}Si$  NMR of  $T_{10}Cl_{10}$ . Asterisk represents signal from  $CDCl_3$ .

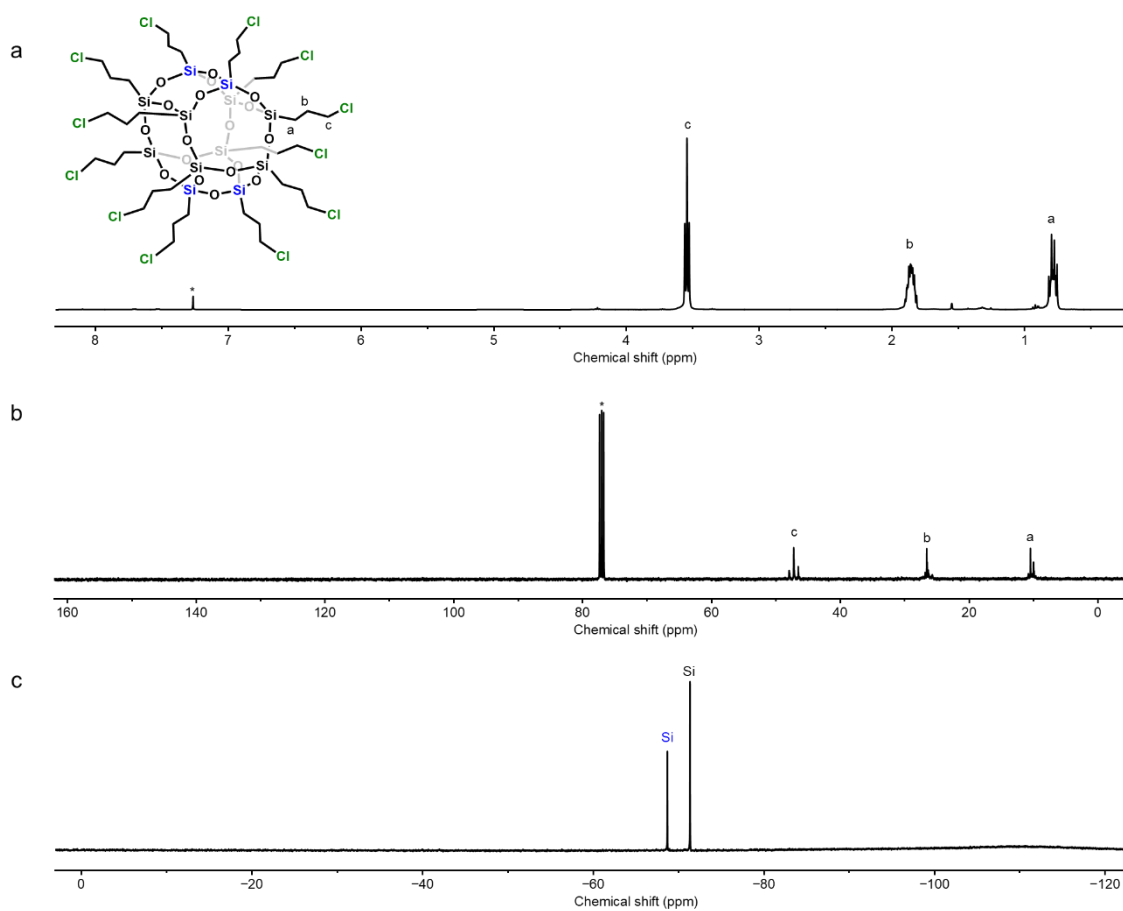

**Fig. S3.** (a)  $^1H$  NMR, (b)  $^{13}C$  NMR, and (c)  $^{29}Si$  NMR of  $T_{12}Cl_{12}$ . Asterisk represents signal from  $CDCl_3$ .

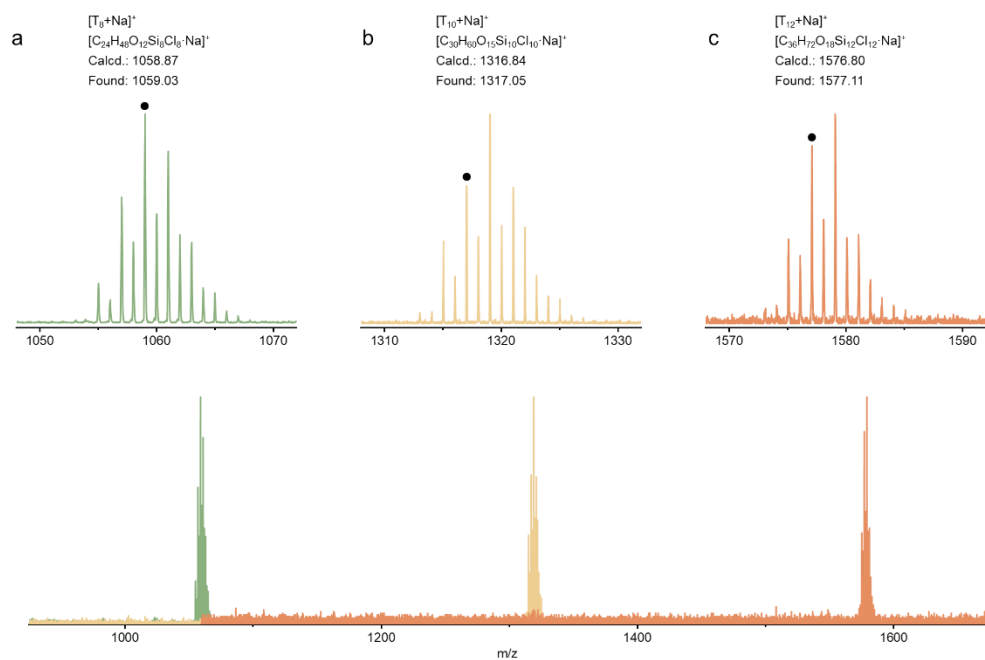

**Fig. S4.** MALDI-TOF MS of (a)  $T_8Cl_8$ , (b)  $T_{10}Cl_{10}$ , and (c)  $T_{12}Cl_{12}$ .

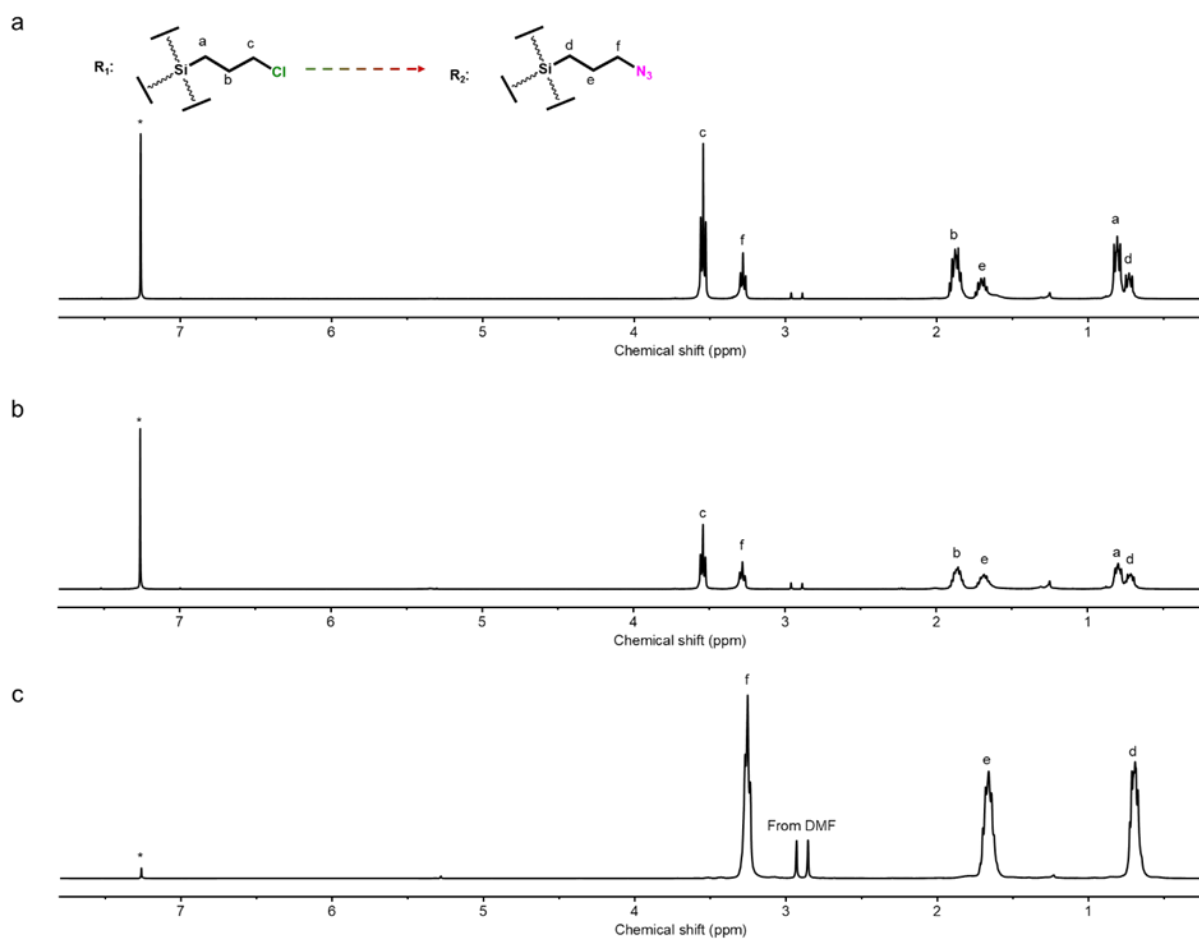

**Fig. S5.**  $^1H$  NMR spectra of  $T_8Cl_8$  after reaction with  $NaN_3$  for (a) 2 h, (b) 8 h, and (c) 16 h. Asterisk represents signal from  $CDCl_3$ .

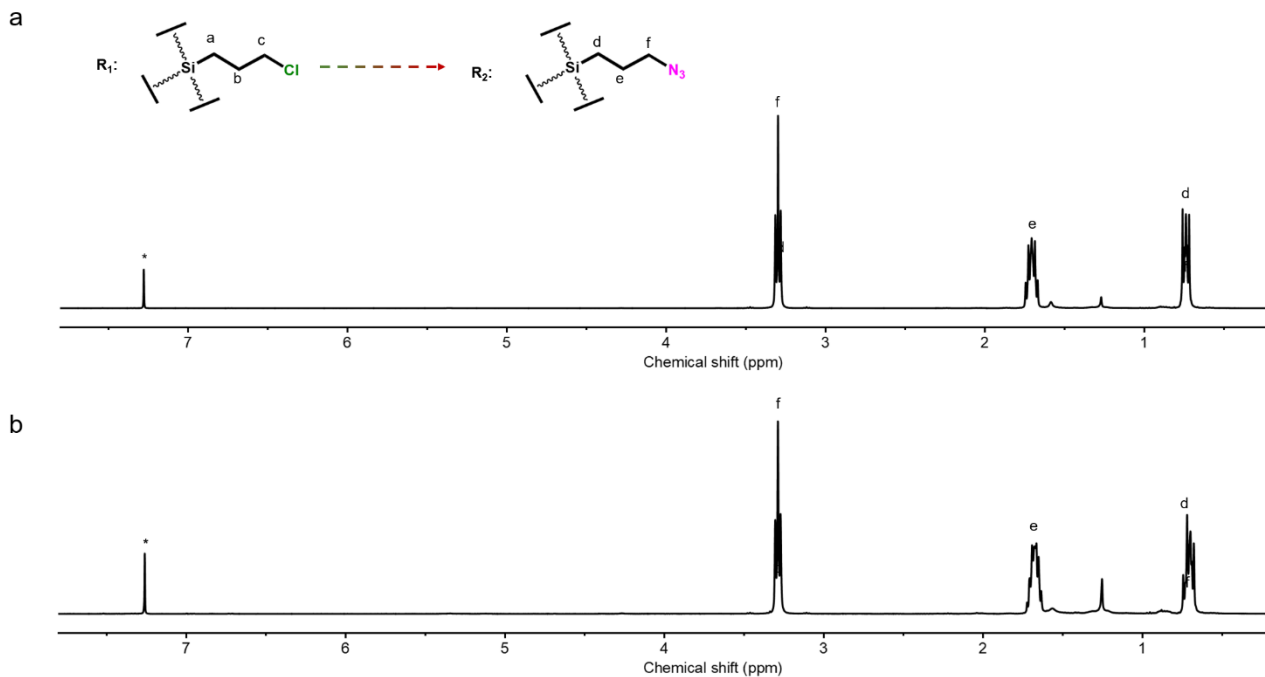

**Fig. S6.**  $^1\text{H}$  NMR of  $\text{T}_n(\text{N}_3)_n$  mixtures prepared from (a)  $\text{T}_{10}\text{Cl}_{10}$  and (b)  $\text{T}_{12}\text{Cl}_{12}$ , respectively. The reaction time is 16 h. Asterisk represents signal from  $\text{CDCl}_3$ .

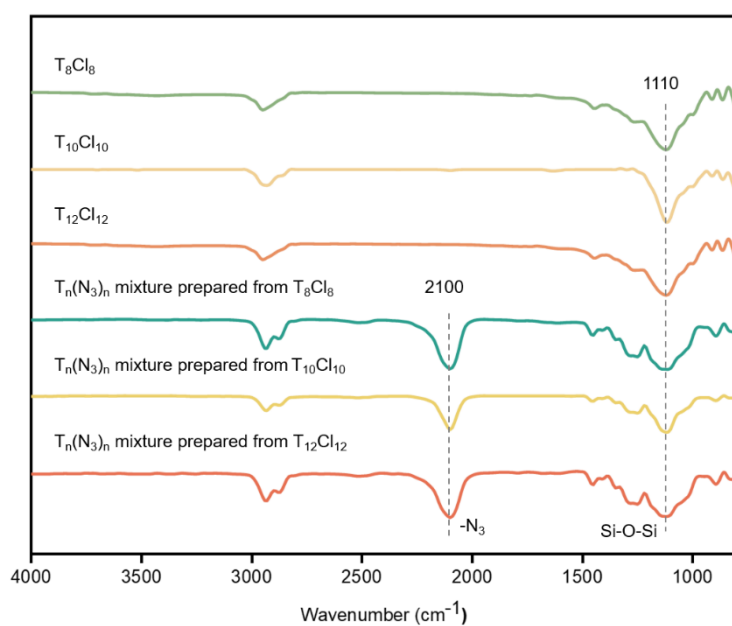

**Fig. S7.** FT-IR spectra of  $\text{T}_8\text{Cl}_8$ ,  $\text{T}_{10}\text{Cl}_{10}$ ,  $\text{T}_{12}\text{Cl}_{12}$ , and  $\text{T}_n(\text{N}_3)_n$  mixtures prepared from  $\text{T}_8\text{Cl}_8$ ,  $\text{T}_{10}\text{Cl}_{10}$ ,  $\text{T}_{12}\text{Cl}_{12}$ , respectively. The reaction time is 16 h.



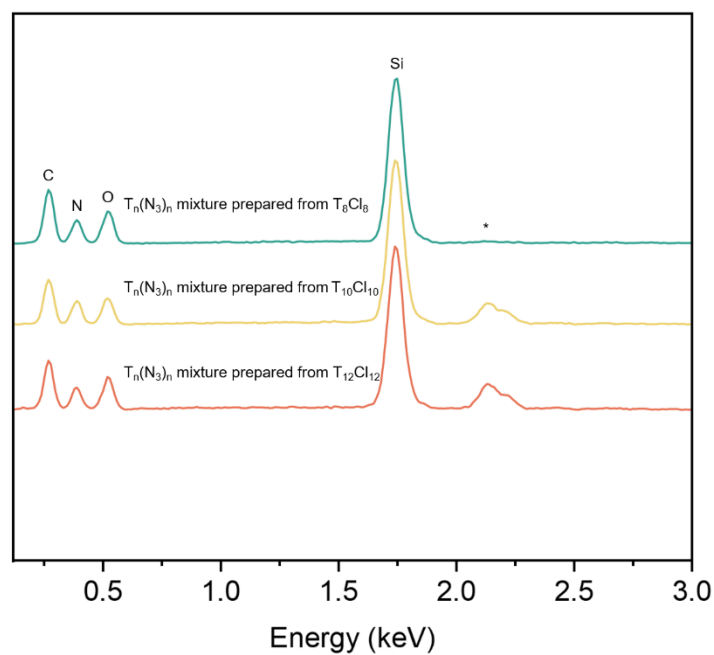

**Fig. S8.** EDS spectra of  $T_n(N_3)_n$  mixtures prepared from  $T_8Cl_8$ ,  $T_{10}Cl_{10}$ ,  $T_{12}Cl_{12}$ , respectively. Asterisk represents signal from Au.

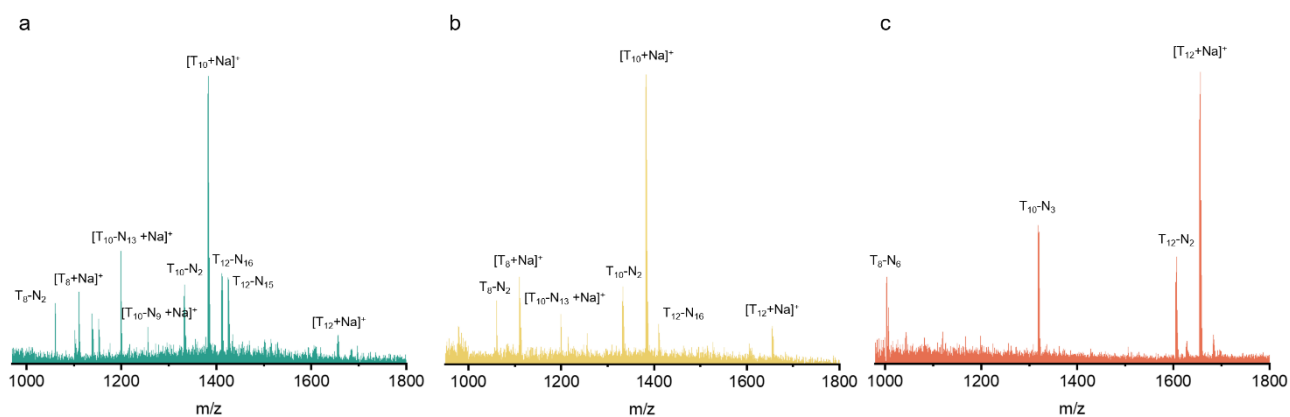

**Fig. S9.** MALDI-TOF MS of  $T_n(N_3)_n$  mixtures prepared from (a)  $T_8Cl_8$ , (b)  $T_{10}Cl_{10}$ , (c)  $T_{12}Cl_{12}$ , respectively. The reaction time is 16 h.

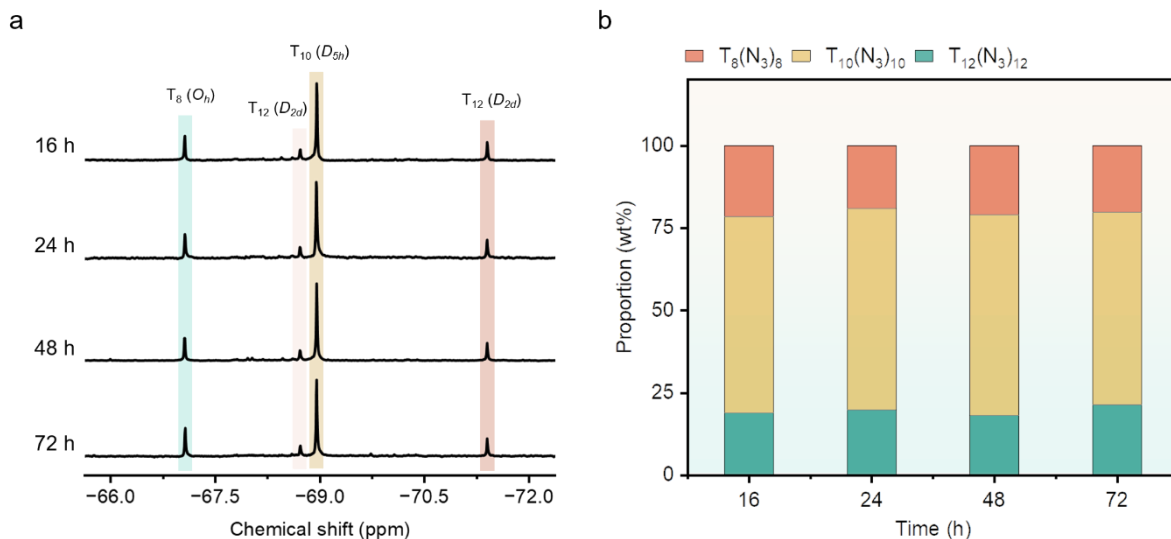

**Fig. S10.** (a)  $^{29}\text{Si}$  NMR spectra of  $\text{T}_8\text{Cl}_8$  after reaction with  $\text{NaN}_3$  for 16, 24, 48, and 72 h; (b) their corresponding mass proportion distribution calculated based on  $^{29}\text{Si}$  NMR spectra. It should be noted that the product yields, which were approximately 80%, remained consistent regardless of reaction time.

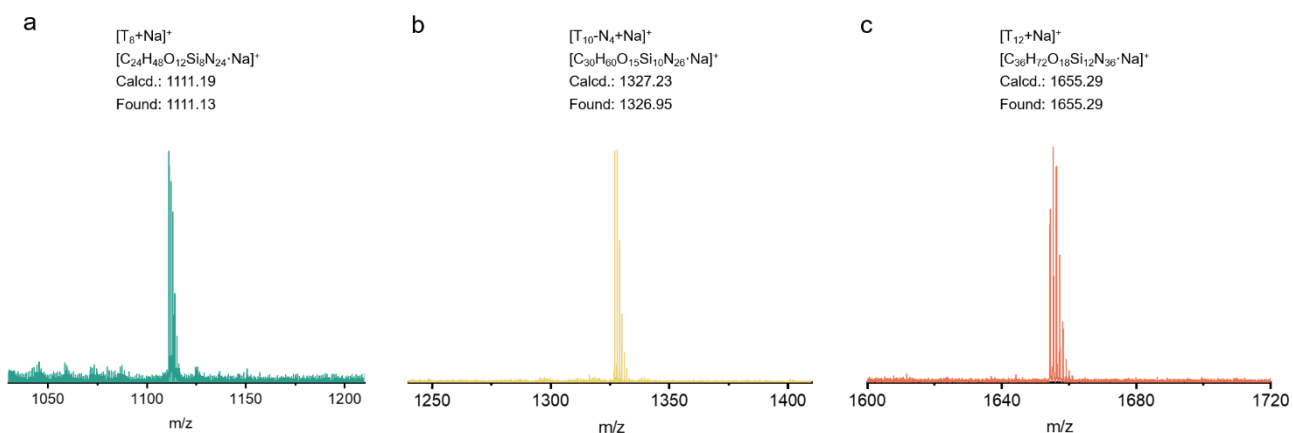

**Fig. S11.** MALDI-TOF MS of highly pure (a)  $\text{T}_8(\text{N}_3)_8$ , (b)  $\text{T}_{10}(\text{N}_3)_{10}$ , and (c)  $\text{T}_{12}(\text{N}_3)_{12}$ .

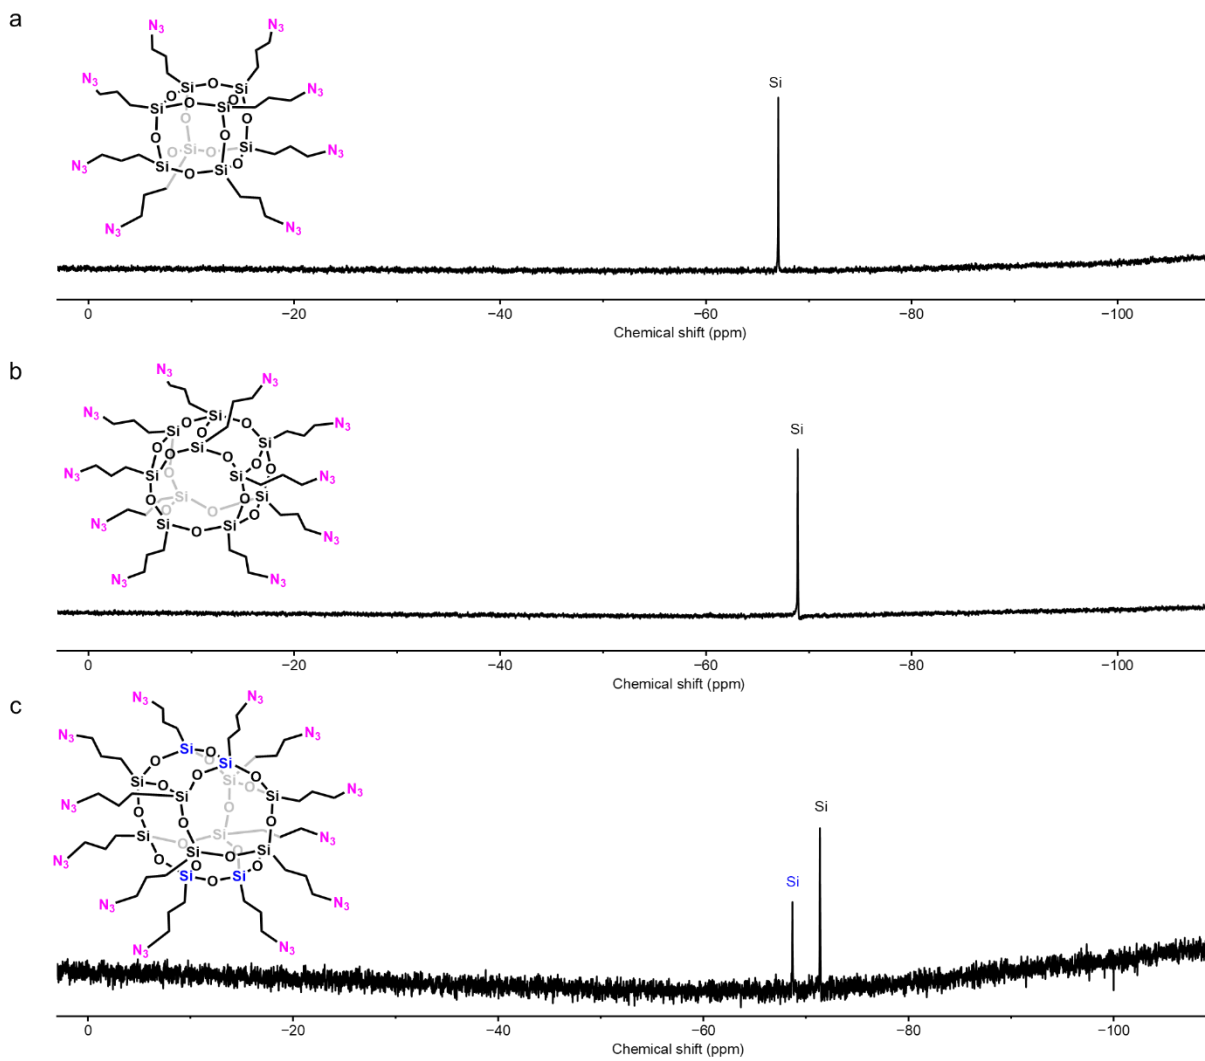

**Fig. S12.**  $^{29}\text{Si}$  NMR of highly pure (a)  $\text{T}_8(\text{N}_3)_8$ , (b)  $\text{T}_{10}(\text{N}_3)_{10}$ , and (c)  $\text{T}_{12}(\text{N}_3)_{12}$ . Asterisk represents signal from  $\text{CDCl}_3$ .

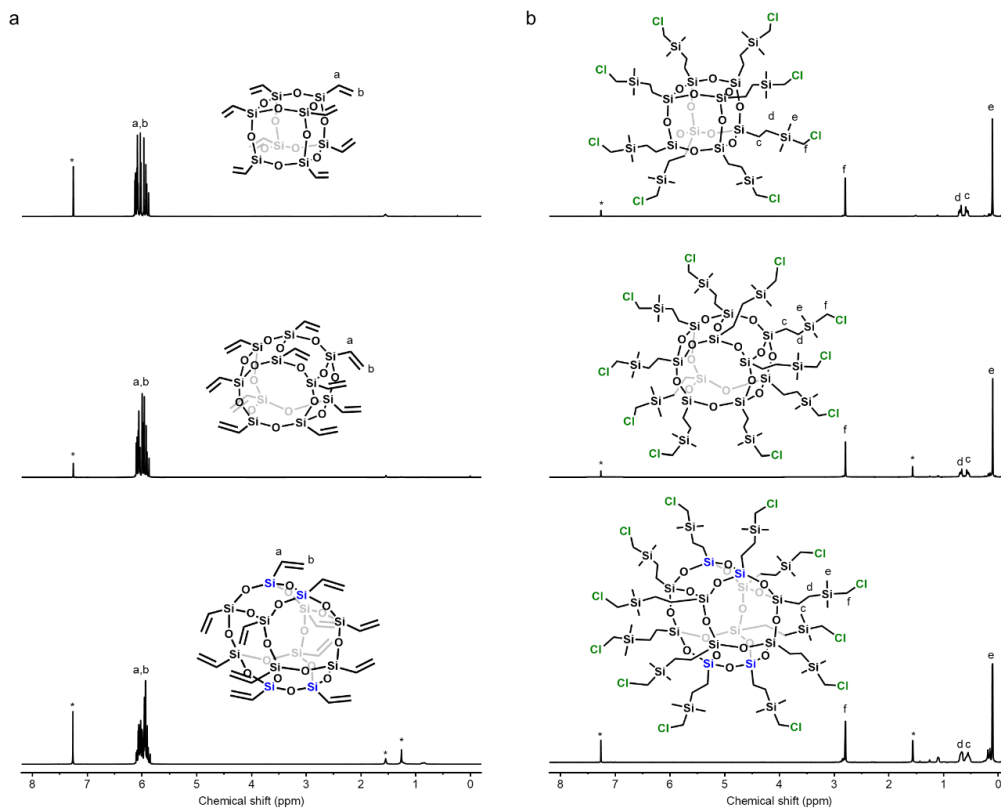

**Fig. S13.**  $^1\text{H}$  NMR of (a)  $\text{T}_n\text{V}_n$ , and (b)  $\text{T}_n(\text{SiCl})_n$ . Asterisk represents signal from  $\text{CDCl}_3$ .

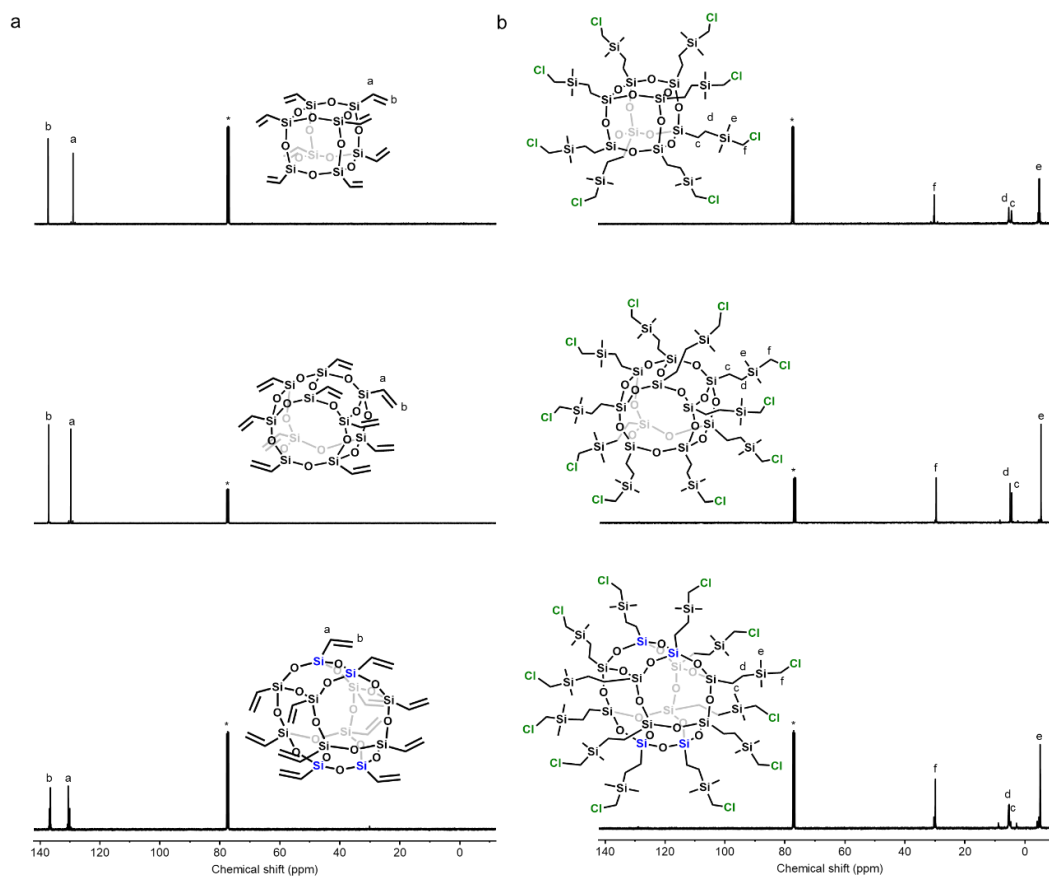

**Fig. S14.**  $^{13}\text{C}$  NMR of (a)  $\text{T}_n\text{V}_n$ , and (b)  $\text{T}_n(\text{SiCl})_n$ . Asterisk represents signal from  $\text{CDCl}_3$ .

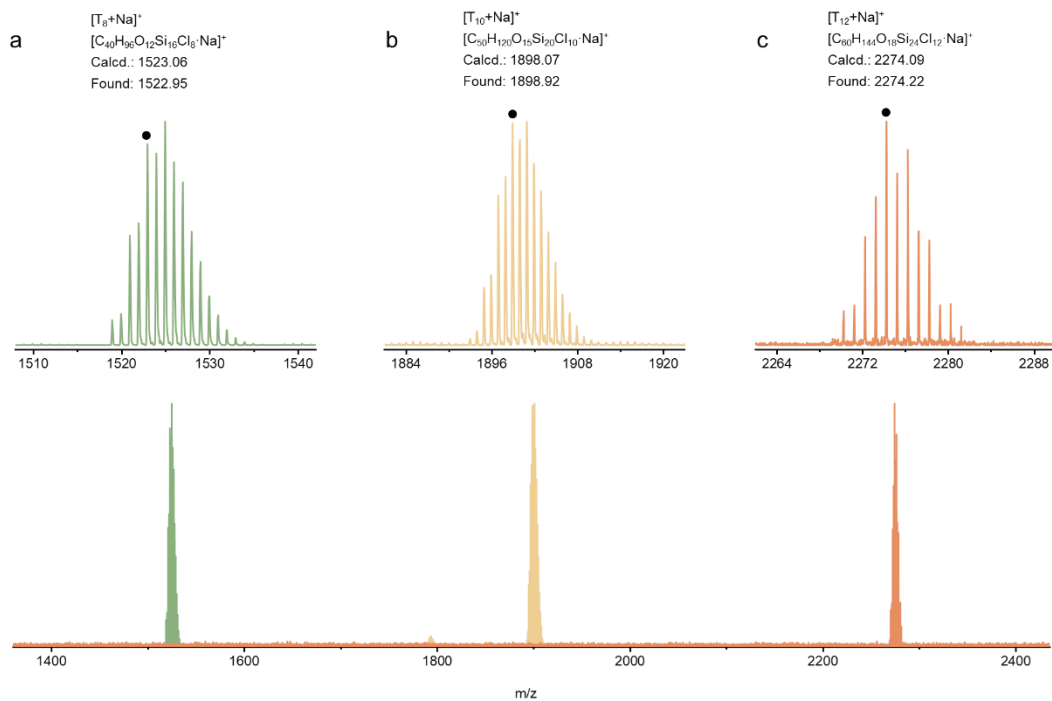

**Fig. S15.** MALDI-TOF mass spectra of (a)  $T_8(\text{SiCl})_8$ , (b)  $T_{10}(\text{SiCl})_{10}$ , and (c)  $T_{12}(\text{SiCl})_{12}$ .

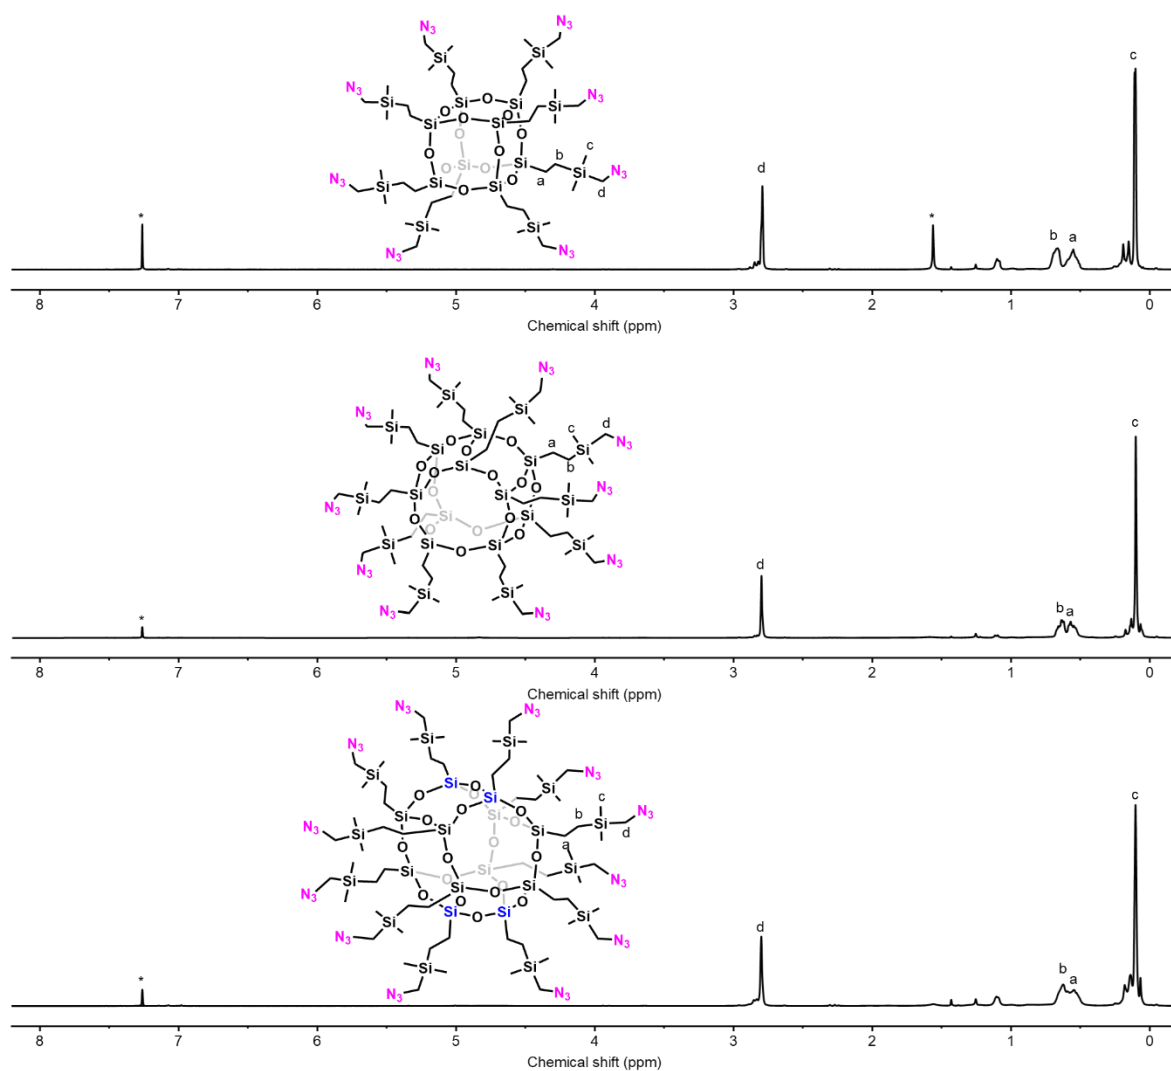

**Fig. S16.**  $^1\text{H}$  NMR of  $T_n(\text{SiN}_3)_n$ . Asterisk represents signal from  $\text{CDCl}_3$ .

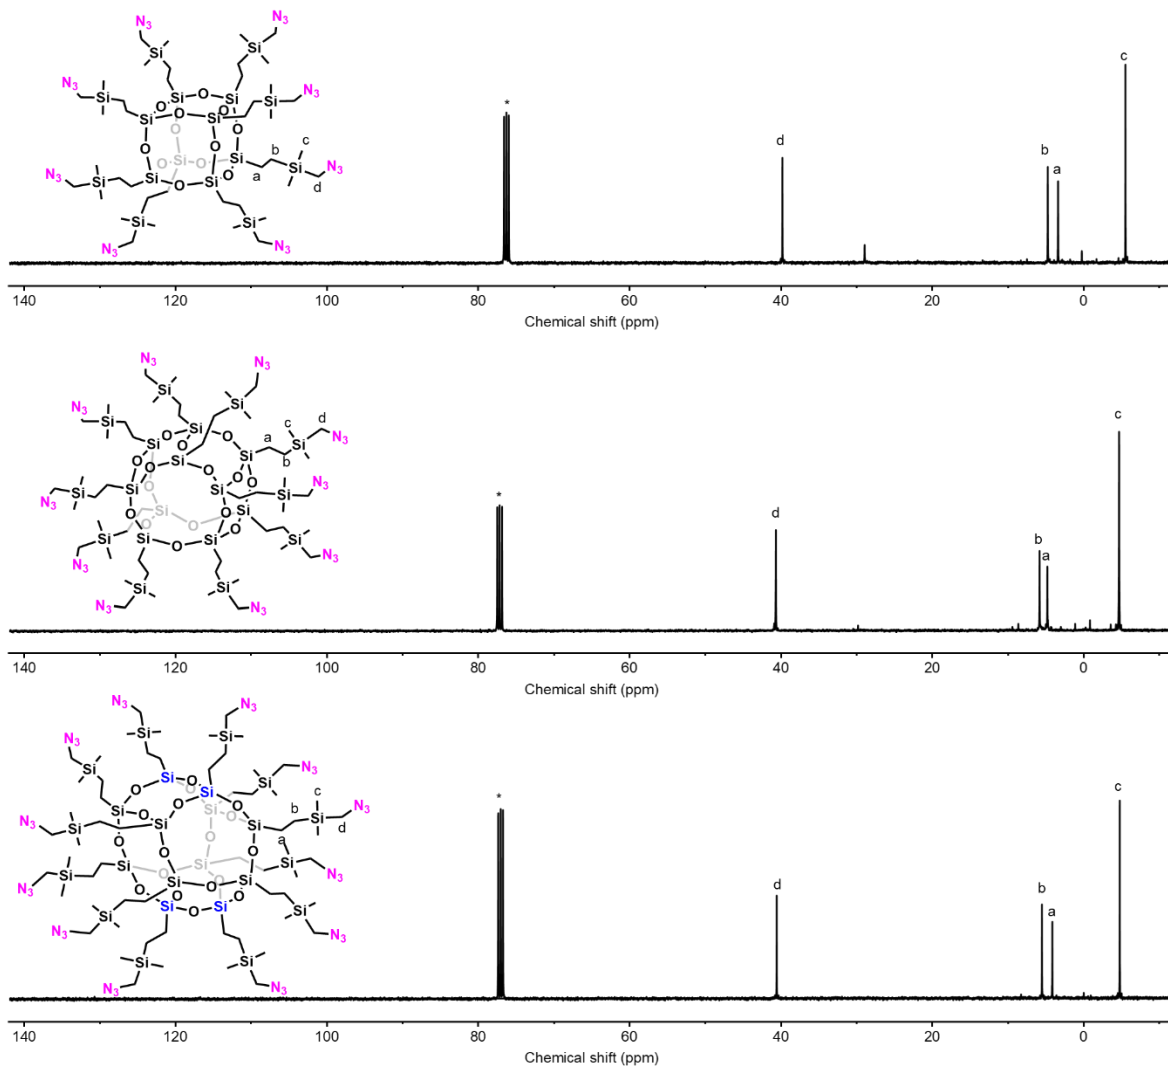

**Fig. S17.**  $^{13}\text{C}$  NMR of  $\text{T}_n(\text{SiN}_3)_n$ . Asterisk represents signal from  $\text{CDCl}_3$ .

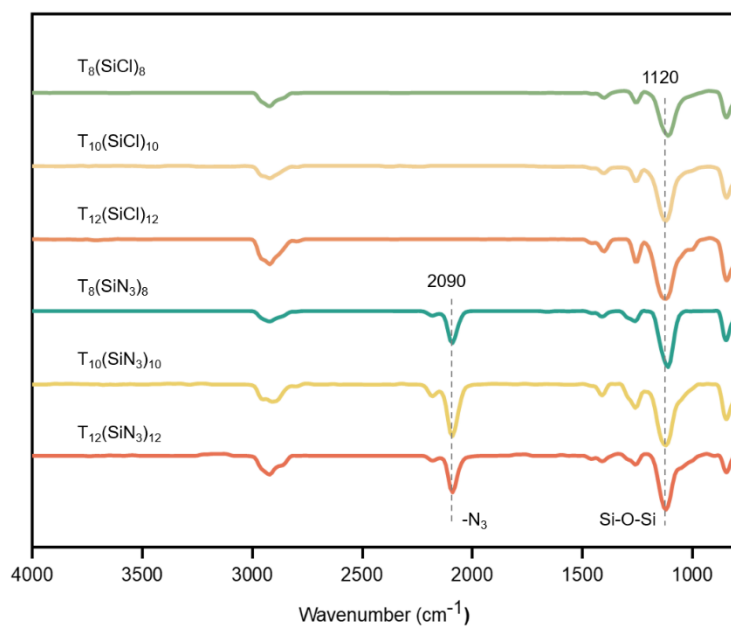

**Fig. S18.** FT-IR spectra of  $\text{T}_8(\text{SiCl})_8$ ,  $\text{T}_{10}(\text{SiCl})_{10}$ ,  $\text{T}_{12}(\text{SiCl})_{12}$ ,  $\text{T}_8(\text{SiN}_3)_8$ ,  $\text{T}_{10}(\text{SiN}_3)_{10}$ , and  $\text{T}_{12}(\text{SiN}_3)_{12}$ .

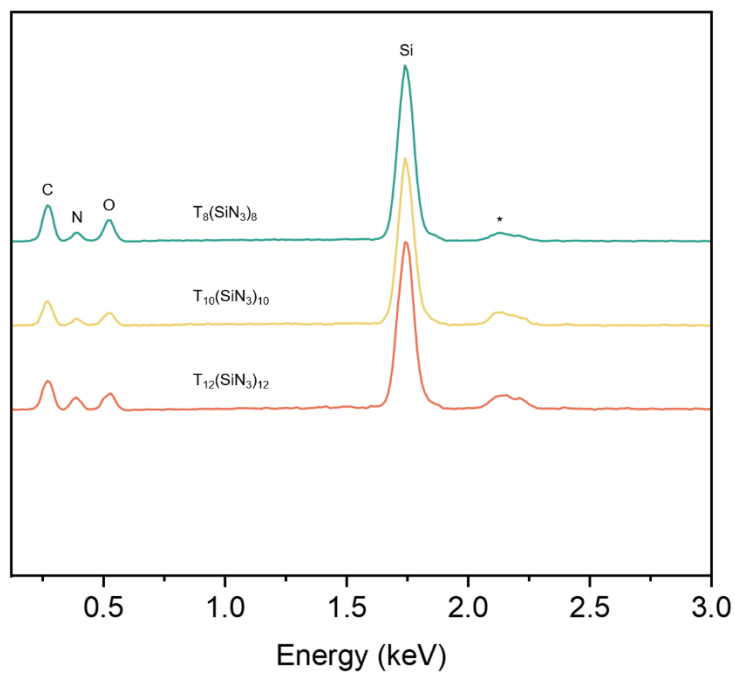

**Fig. S19.** EDS spectra of  $T_8(\text{SiN}_3)_8$ ,  $T_{10}(\text{SiN}_3)_{10}$ , and  $T_{12}(\text{SiN}_3)_{12}$ . Asterisk represents signal from Au.

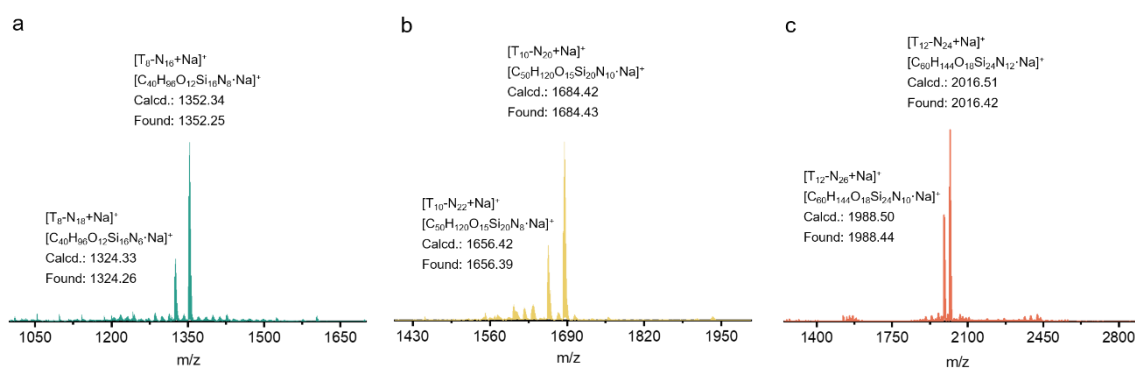

**Fig. S20.** MALDI-TOF MS of (a)  $T_8(\text{SiN}_3)_8$ , (b)  $T_{10}(\text{SiN}_3)_{10}$ , and (c)  $T_{12}(\text{SiN}_3)_{12}$ . It should be emphasized that the fragmentation of the azide functionality via expulsion of  $\text{N}_2$  gives rise to ions 28 mass units less than the mass of the compound, as reported by Grayson et al.<sup>3</sup>

**Table S1.** The experimental and theoretical relative element content (mass fraction) of  $T_n(N_3)_n$  mixtures prepared from  $T_8Cl_8$ ,  $T_{10}Cl_{10}$ ,  $T_{12}Cl_{12}$ . <sup>a</sup>

| Starting Material       | C     | N     | O     | Si    |
|-------------------------|-------|-------|-------|-------|
| $T_8Cl_8$               | 34.85 | 28.86 | 19.35 | 16.93 |
| $T_{10}Cl_{10}$         | 33.23 | 30.76 | 17.63 | 18.37 |
| $T_{12}Cl_{12}$         | 34.40 | 27.76 | 20.04 | 17.80 |
| Theoretical Value (wt%) | 27.70 | 32.26 | 18.45 | 21.59 |

<sup>a</sup> Calculated from EDS spectra.

**Table S2.** Product type and mass proportion distribution of  $T_n(N_3)_n$  mixtures prepared from cage-rearranged  $T_8Cl_8$ ,  $T_{10}Cl_{10}$ , and  $T_{12}Cl_{12}$ . The relative mass proportions of  $T_8(N_3)_8$ ,  $T_{10}(N_3)_{10}$ , and  $T_{12}(N_3)_{12}$  were calculated based on the peak areas of  $^{29}Si$  NMR spectra.

| Starting Material | Characterization    | $T_8(N_3)_8$ | $T_{10}(N_3)_{10}$ | $T_{12}(N_3)_{12}$ |
|-------------------|---------------------|--------------|--------------------|--------------------|
| $T_8Cl_8$         |                     | 19           | 60                 | 21                 |
| $T_{10}Cl_{10}$   | $^{29}Si$ NMR (wt%) | 18           | 70                 | 12                 |
| $T_{12}Cl_{12}$   |                     | 2            | 9                  | 89                 |

**Table S3.** The experimental and theoretical relative element content (mass fraction) of  $T_8(SiN_3)_8$ ,  $T_{10}(SiN_3)_{10}$ , and  $T_{12}(SiN_3)_{12}$ .

| Sample                  | C     | N     | O     | Si    |
|-------------------------|-------|-------|-------|-------|
| $T_8(SiN_3)_8$          | 39.06 | 16.03 | 13.93 | 30.98 |
| $T_{10}(SiN_3)_{10}$    | 40.65 | 17.48 | 13.07 | 28.80 |
| $T_{12}(SiN_3)_{12}$    | 35.87 | 25.05 | 14.67 | 24.41 |
| Theoretical Value (wt%) | 32.95 | 23.05 | 13.17 | 30.83 |

<sup>a</sup> Calculated from EDS spectra.



## References

1. U. Dittmar, B. J. Hendan, U. Flörke and H. C. Marsmann, *J. Organomet. Chem.*, 1995, **489**, 185.
2. S. Hanprasit, N. Tungkijanansin, A. Prompawilai, S. Eangpayung and V. Ervithayasuporn, *Dalton T.*, 2016, **45**, 16117.
3. Y. Li, J. N. Hoskins, S. G. Sreerama and S. M. Grayson, *Macromolecules*, 2010, **43**, 6225.
